# **Carry on caring: infected females maintain their level of**

## **2 parental care despite suffering high mortality**

4 Tom Ratz, Katy M. Monteith, Pedro F. Vale & Per T. Smiseth

6 Institute of Evolutionary Biology, School of Biological Sciences, University of Edinburgh,  
Edinburgh, UK

8 **Abstract**

Parental care is a key component of an organism's reproductive strategy that is thought to trade-off  
10 with allocation towards immunity. Yet it is unclear how caring parents respond to pathogens: do  
infected parents reduce their amount of care as a sickness behaviour or simply from being ill, or do  
12 they prioritise their offspring by maintaining high levels of care? Here we explored the  
consequences of infection by the pathogen *Serratia marcescens* on mortality, time spent providing  
14 care, reproductive output, and expression of immune genes of female parents in the burying beetle  
*Nicrophorus vespilloides*. We compared untreated control females with infected females that were  
16 inoculated with live bacteria, immune-challenged females that were inoculated with heat-killed  
bacteria, and injured females that were injected with buffer. We found that infected and immune-  
18 challenged females mounted an immune response and that infected females suffered increased  
mortality. Nevertheless, infected and immune-challenged females maintained their normal level of  
20 care and reproductive output. There was thus no evidence that infection led to either a decrease or  
an increase in parental care or reproductive output. Our results show that parental care, which is  
22 generally highly flexible, can remain remarkably robust and consistent despite the elevated  
mortality caused by infection by pathogens. Overall, these findings suggest that infected females  
24 maintain a high level of parental care; a strategy that may ensure that offspring receive the  
necessary amount of care but that might be detrimental to the parents' own survival or that may  
26 even facilitate disease transmission to offspring.

28 **Keywords:** Anti-microbial peptide expression, immunity, parental care, *Nicrophorus vespilloides*,  
reproductive investment

## 30 **Introduction**

When infected by a pathogen, animals often alter their behaviours and social interactions (Hart,  
32 1988; Kelley et al., 2003; Adelman & Martin 2009; Vale et al., 2018). This change in behaviour  
may occur as a side effect of lethargy (Adelman & Martin, 2009) or it may represent what is known  
34 as sickness behaviour; a strategic decision to shift resources towards immune defence by reducing  
activity levels (Lopes et al., 2016; van Kerckhove et al., 2013) and costly social interactions (Bos et  
36 al., 2012). Lethargy may be a consequence of the pathogen negatively impacting on the host's  
ability to remain active, thus leading to reduced mobility (e.g. Bradley et al., 2005; Cameron et al.,  
38 1993), foraging (e.g. Levri & Lively, 1996; Venesky et al., 2009) and social activity (Lopes et al.,  
2016). Lethargy may also be associated with sickness behaviour, an adaptive adjustment to fight the  
40 infection that allows the host to diverge resources from non-essential activities, such as social  
interactions, to the immune system (Hart, 1988; Exton, 1997; Johnson, 2002). When individuals  
42 interact with family members, sickness behaviour may also help reduce the risk of disease  
transmission to close kin (Heinze & Walter, 2010; Stroeymeyt et al., 2018) as a possible kin-  
44 selected behaviour (Shakhar & Shakhar, 2015; Shakhar, 2019). However, recent empirical evidence  
shows that sick individuals often maintain their social interactions with close kin (Lopes et al.,  
46 2018; Stockmaier et al., 2020). Yet empirical studies testing the effects of infection on social  
behaviour towards close kin are still scarce, with most studies being based on immune challenges  
48 (injecting with heat-killed pathogens or products from pathogens; e.g. Aubert et al., 1997;  
Bonneaud et al., 2003; Stockmaier et al., 2020) that exclude potential effects of the pathogen on  
50 host's behaviour.

Parental care is a key component of an organism's reproductive strategy in many birds,  
52 mammals, and insects (Royle et al., 2012) that is thought to trade-off with allocation of resources  
towards immunity (Richner et al., 1995). Caring parents incur costs of care in terms of increased  
54 energy expenditure, reduced opportunities for additional reproductive attempts, reduced survival,

and/or reduced future reproductive success (Williams, 1966). Parental care enhances offspring  
56 growth and/or survival by neutralising environmental hazards to offspring, including risks  
associated with starvation, predation, parasitism, and competition (Royle et al., 2012). Thus, when  
58 infected by a pathogen, parents face the dilemma of whether to shift allocation towards immunity at  
the expense of maintaining their level of parental care, or maintain the level of parental care at the  
60 expense of increasing their allocation towards immunity. Parents that reduce their level of care to  
increase their immune response would risk impairing their offspring's growth and survival, whereas  
62 parents that maintain their level of care would risk falling ill by not mounting an adequate immune  
response. Experimental studies using immune-challenges found that female laboratory mice tend to  
64 maintain their level of care and maintain normal offspring growth and survival (Aubert et al., 1997),  
while house sparrows drastically reduce their food provisioning at the cost of reduced offspring  
66 survival (Bonneaud et al., 2003). Thus, it is unclear how caring parents balance allocation towards  
parental care and immunity in response to infection: do infected parents reduce or maintain their  
68 level of care, and is there a trade-off between the magnitude of the immune responses and the level  
of parental care?

70 Here, we investigated how parents balance their allocation towards parental care and  
immunity in response to infection in the burying beetle *Nicrophorus vespilloides*. This is an ideal  
72 system to investigate this issue because it is one of the few insects with extensive parental care.  
Parental care includes provisioning of food to larvae, defence against predators and infanticidal  
74 conspecific intruders and production of antimicrobials and enhances the offspring's growth and  
survival (Scott, 1998; Eggert et al., 1998; Smiseth et al., 2003; Rozen et al., 2008). Burying beetles  
76 show changes in immunity during parental care (Steiger et al., 2011), which include differential  
expression of antimicrobial peptides (Jacobs et al., 2016; Ziadie et al., 2019). Parents may mount a  
78 personal immune response that helps them deal with pathogens. However, there is also evidence  
that parents invest in social immunity that benefits the offspring but is costly to the parents (Cotter

80 & Kilner, 2010b; Ziadie et al., 2019). Social immunity in burying beetles occurs as parents coat the  
carcass with exudates with potent antibacterial activity (Cotter & Kilner, 2010b), which reduces  
82 microbial load and improves the offspring's survival (Rozen et al., 2008).

To test for a causal effect of infection on parental care and immunity, we monitored the  
84 amount of care provided by infected females that were inoculated with live bacteria, immune-  
challenged females that were inoculated with heat-killed bacteria, injured females that were injected  
86 with buffer, and untreated control females. We also monitored their life span and overall  
reproductive output. In parallel, we quantified the personal and social immune responses of females  
88 in each treatment by measuring the expression of genes encoding antimicrobial peptides, namely  
*attacin-4*, *cecropin-1*, *coleoptericin-1* and *PGRP-SC2*. If females respond to infection by shifting  
90 their allocation towards immunity, we would expect infected and/or immune-challenged females to  
show a reduction in parental care and an increase in the overall expression of immune genes.  
92 Alternatively, if females respond to infection and/or immune-challenges by shifting allocation  
towards current reproduction, we would expect infected and/or immune-challenged females to maintain  
94 their level of parental care and show a reduction in the overall expression of immune genes. Assuming  
there is a trade-off between personal and social immunity (Cotter & Kilner, 2010a), we expect an  
96 increase in the expression of genes involved in personal immunity relative to the expression of  
genes involved in social immunity if infected and/or immune-challenged females shift allocation  
98 towards their own immunity. Alternatively, we would expect a reduction in the expression of genes  
involved in personal immunity relative to the expression of genes involved in social immunity if  
100 infected and/or immune-challenged females shift allocation towards current reproduction.

## 102 **Materials and methods**

### *Origin and rearing of experimental beetles*

104 Experimental beetles originated from wild individuals collected in the Hermitage of Braid and

Blackford Hill Local Nature Reserve, Edinburgh, U.K. The beetles had been maintained in a large  
106 outbred population (200–300 individuals were bred per generation) under laboratory conditions for  
at least 5 generations before the start of our experiment. Non-breeding adult beetles were housed in  
108 individual transparent plastic containers (12 cm x 8 cm x 2 cm) filled with moist soil, under  
constant temperature at 20°C, 16:8h light:dark photoperiod and ad libitum access to organic beef as  
110 food supply.

### 112 ***Experimental design and procedures***

To investigate the effects of infection on parental care, reproductive output and immunity, we used  
114 a group of untreated control females ( $N_{\text{Control}} = 61$ ) and three groups of experimental females:  
infected females that were inoculated with the pathogenic bacteria *Serratia marcescens* ( $N_{\text{Infected}} =$   
116 58), immune-challenged females that were inoculated with heat-killed bacteria ( $N_{\text{Challenged}} = 70$ ), and  
injured females that were injected with buffer ( $N_{\text{Injured}} = 56$ ). At the beginning of the experiment,  
118 each individual virgin female was randomly assigned an unrelated male partner and transferred to a  
larger plastic container (17 cm x 12 cm x 6 cm) lined with moist soil and containing a freshly  
120 thawed mouse carcass of a standardized size (19.97–23.68g) (Livefoods Direct, Sheffield). We  
weighed each female on the day before the anticipated hatching date (i.e. two days after the onset of  
122 egg-laying; Smiseth, Ward, & Moore, 2006). We then placed females in an individual plastic vial  
plugged with cotton. Females remained in this vial until we applied the treatment (see details  
124 below), after which they were transferred into a new large container containing fresh soil and  
supplied with their original carcass. We left the eggs to develop in the old container, while males  
126 were discarded. We separated the females from the eggs so that we could allocate each female with  
an experimental brood of 15 same-aged larvae of mixed maternal origin. We removed the male to  
128 avoid any potential effects of male parental care buffering against effects of the experimental  
treatment on the female. Male removal has no effect on the developing brood under laboratory

130 conditions (Smiseth et al., 2005). We next set up experimental broods of 15 larvae by collecting  
newly hatched larvae emerging in the soil, starting the day following the separation of females and  
132 eggs. We generated experimental broods by pooling larvae that had hatched from eggs laid by  
multiple females (Smiseth et al., 2007). We used a standardized brood size that was comprised of  
134 15 larvae of a known age to avoid any potential confounding effects of variation in the number and  
age of the larvae on maternal behaviour (Smiseth et al., 2003; Ratz & Smiseth, 2018). Given that  
136 parents will kill any larvae that emerge on the carcass before their own eggs have hatched (Müller  
& Eggert, 1990), we only allocated an experimental brood to a female once her own eggs had  
138 hatched.

#### 140 ***Bacterial preparation***

We chose *Serratia marcescens* (strain DB11) as an appropriate natural bacterial pathogen for  
142 *N.vespillodies*. *Serratia marcescens* is a gram-negative bacterium commonly found in the soil and  
on decomposing carrion (Hejazi & Falkiner, 1997; El Sanousi et al, 1987). It has been shown to  
144 infect several insect species and is known to cause mortality in both eggs and larva of *N.*  
*vespilloides* (Wang & Rozen, 2018; Jacobs et al, 2014). Pilot tests confirmed that *S. marcescens*  
146 increased female mortality (Ratz et al., unpublished data), but only when injected above a certain  
concentration and volume (see below). We also note that our pilot tests showed that stabbing with  
148 *Pectobacterium carotovorum*, *Pseudomonas aeruginosa*, and injections with *Pseudomonas*  
*entomophila* had no detectable effect on female mortality.

150 To grow the *S. marcescens* culture, we inoculated 10 mL of Luria-Bertani (LB) broth  
(Fisher Scientific) with 200 µL of a frozen 25% glycerol suspension from a single isolated *S.*  
152 *marcescens* colony. The culture was aerobically incubated overnight in an orbital shaker at 140 rpm  
and 30°C. On the day of infection, the overnight culture was diluted 1:10 into fresh LB broth and  
154 incubated under the same conditions until the culture had reached the mid-log growth phase (OD<sub>600</sub>

0.6–0.8). Optical density was checked using a microplate absorbance reader at an absorbance of 600  
156 nm. The mid-log phase culture was pelleted by centrifugation (15 min, 4°C, 2500 rpm) and the  
supernatant removed. The pellet was then re-suspended in sterile Phosphate Buffer Saline (PBS, pH  
158 7.4) and adjusted to OD<sub>600</sub> 1. The final inoculum OD<sub>600</sub> was calculated as described in Siva-Jothy et  
al. (2018). The final inoculum was split into two tubes; one tube was heated to 70°C for 45 min  
160 killing the bacteria and allowing for an immune-challenged treatment group while the other tube  
was kept as a live culture for the infected treatment group.

162

### ***Infection procedure***

164 On the day preceding the expected date of hatching, we randomly allocated each female to an  
experimental treatment group. Female from all treatment groups were first anaesthetised by releasing  
166 CO<sub>2</sub> into their individual tube for 40 s. Control females were then returned to their vials to recover  
for 30 min, while experimental females were placed on a CO<sub>2</sub> pad under a dissecting microscope.  
168 We used a glass needle attached to a microinjector (Nanoject II, Drummond Scientific Co) to inject  
injured females with 0.552 µL of sterile PBS buffer, immune-challenged females with 0.552 µL of  
170 heat-killed *S. marcescens* solution, and infected females with 0.552 µL of OD<sub>600</sub> 1 live *S.*  
*marcescens* solution (~1.3 million colony forming units). We performed the injection by  
172 introducing the needle through the soft cuticle that joins the thorax and the abdomen on the ventral  
side (Reavey et al., 2014). Once injected, experimental females were returned to their vials to  
174 recover for 30 min. Following recovery, we next moved control and injected females back to the  
large containers containing their carcasses.

176

### ***Maternal care, female weight change, female mortality, and offspring performance***

178 We recorded the amount of care provided by each female 24 h (±15 min) after we placed the larvae  
on the carcass, which corresponded to 48 h (±4 h) after females were handled and/or injected. We



180 performed direct observations under red light for 30 min, recording maternal behaviour every 1 min  
in accordance with established protocols (e.g., Smiseth & Moore 2002, 2004; Ratz & Smiseth  
182 2018). We recorded maternal care as food provisioning, defined as when there was mouth-to-mouth  
contact between the female and at least one larva, and carcass maintenance, defined as when the  
184 female was excavating the soil around the carcass or coating the carcass with antimicrobial  
secretions. We conducted the behavioural observations blindly with respect to treatment, as it was  
186 not possible for the observer to identify the experimental treatments.

Females and their broods were then left undisturbed until larvae completed their  
188 development, at which stage they left the mouse carcass to disperse into the soil. At dispersal, we  
weighed the female, counted the number of larvae and weighed the brood. We estimated weight  
190 gain over the reproductive attempts by the female as the difference in body mass between egg-  
laying and larval dispersal. We estimated larval survival as the difference between the final brood  
192 size at dispersal and the initial brood size at hatching (i.e. 15 larvae), and mean larval mass as the  
total brood mass divided by brood size.

194

#### ***Hemolymph sampling, RNA extraction, reverse transcription, and qPCR***

196 To examine the effects of the treatment on the female's immune response, we quantified the  
expression of genes coding for antimicrobial peptides (AMPs) by quantitative real-time polymerase  
198 chain reaction (qRT-PCR). We focused on the expression of the four following genes: *attacin-4*,  
*cecropin-1*, *coleoptericin-1* and *PGRP-SC2*. We focused on these genes because they are known to  
200 have a role in the immune response against gram-negative bacteria, such as *S. marcescens* (Imler &  
Bulet, 2005; Vilcinskas et al., 2013a,b) and there is some knowledge about their function in  
202 personal or social immunity in this species (Jacobs et al., 2016; Parker et al., 2015; Ziadie et al.,  
2019): *attacin-4*, *cecropin-1*, and *coleoptericin-1* seem to play a role mainly in personal immunity  
204 (Jacobs et al., 2016), while *PGRP-SC2* plays a role in social immunity (Parker et al., 2015; Ziadie et

al., 2019).

206 In parallel with the behavioural observation, we randomly selected a subset of females for  
RNA extraction, which included 13 control, 14 injured, 17 immune-challenged, and 14 infected  
208 females. We removed each of these females from their containers 48 h ( $\pm 4$  h) after infection, and  
placed them in an individual plastic vial plugged with cotton. We then anaesthetised each female  
210 with CO<sub>2</sub> as described above. Once anaesthetised, we extracted hemolymph from each female placed  
on a CO<sub>2</sub> pad by puncturing the soft cuticle behind the thorax with a micro-pipette and then drawing  
212 hemolymph with a 10  $\mu$ L-glass capillary. We sampled 2  $\mu$ L to 10  $\mu$ L of hemolymph per female and  
transferred it into 1.5 $\mu$ L-micro-tubes containing 100  $\mu$ L of TRIzol reagent (Invitrogen, Life  
214 Technologies). All hemolymph samples were then stored at -70°C until RNA extraction.

RNA extractions were performed using the standard phenol-chloroform method and  
216 included a DNase treatment (Ambion, Life Technologies). The RNA purity of eluted samples was  
confirmed using a Nanodrop 1000 Spectrophotometer (version 3.8.1). cDNA was synthesized from  
218 2  $\mu$ L of the eluted RNA using M-MLV reverse transcriptase (Promega) and random hexamer  
primers, and then diluted 1:1 in nuclease free water. We performed quantitative RT-PCR on an  
220 Applied Biosystems StepOnePlus machine using Fast SYBR Green Master Mix (Applied  
Biosystems). We used a 10  $\mu$ L reaction containing 1.5  $\mu$ L of 1:1 diluted cDNA, 5  $\mu$ L of Fast SYBR  
222 Green Master Mix and 3.5  $\mu$ L of a primer stock containing both forward and reverse primers at  
1  $\mu$ M suspended in nuclease free water (final reaction concentration of each primer 0.35  $\mu$ M). For  
224 each cDNA sample, two technical replicates were performed for each set of primers and the average  
threshold cycle (Ct) was used for analysis.

226 Primers were designed based on amino acid sequences provided on Kyoto Encyclopedia of  
Genes and Genomics (KEGG) or supplementary information provided by Jacobs et al. (2016)  
228 (KEGG: PGRP-SC2, Rlp7; Jacobs et al. 2016: Attacin-4, Coleoptericin-1, Cecropin-1). Briefly, the

amino acid sequence was entered into the Basic Local Alignment Search Tool (BLAST) on  
230 NCBI.gov, the accession number producing the most similar alignments within *N. vespilloidies* was  
selected and the corresponding nucleotide sequence used for primer design in Primer3 (version  
232 4.1.0) and Beacon Designer (Premier Biosoft International). All primers were obtained from Sigma-  
Aldrich Ltd; Attacin-4\_Forward: 5' GCATTTACACGCACAGACCT 3', Attacin-4\_Reverse 5'  
234 CGGCAACTTTACTTCCTCCG 3'; Cecropin-1\_Forward 5' CGAGCACACAACAGTTCCTT 3',  
Cecropin-1\_Reverse 5' ATCAAAGCTGCGATGACCAC 3'; Coleoptericin-1\_Forward 5'  
236 GAAACGGTGGTGAACAGGTG 3', Coleoptericin-1\_Reverse 5' GAGTCTTGGGGAACGGGAA  
3'; PGRP-SC2\_Forward 5' CGAAGGTCAAGGTTGGGGTA 3', PGRP-SC2\_Reverse 5'  
238 GTTCCGATGACACAGATGCC 3'. We used Rpl7 as an endogenous reference gene, following  
Jacobs et al. (2014, 2016) and Cunningham et al. (2014); Rpl7\_Forward 5'  
240 GTCGGCAAGAACTTCAAGCA 3', Rpl7\_Reverse 5' TCCCTGTTACCGAAGTCACC 3'. For  
each pair of primers the annealing temperature ( $T_{\square}$ ) was optimised and the efficiency (Eff) of each  
242 primer pair calculated by 10-fold serial dilution of a target template (each dilution was assayed in  
duplicate); Attacin-4:  $T_{\square}$  = 59°C Eff= 102.21%, Cecropin-1:  $T_{\square}$  = 59.5°C Eff= 102.26%,  
244 Coleoptericin-1  $T_{\square}$  = 61.6°C Eff= 101.86%, PGRP-SC2:  $T_{\square}$  = 60.2°C Eff= 99.84%, Rpl7:  $T_{\square}$  =  
60°C Eff= 98.25%.

246

### ***Statistical analysis***

248 All statistical analyses were conducted using R version 3.6.0 (R Development Core Team, 2019)  
loaded with the packages *car* (Fox et al., 2016), *MASS* (Ripley et al., 2017), and *glmmTMB*  
250 (Brooks, et al. 2017). We analysed data on parental care using a zero-inflated binomial model. We  
used ANOVA models to analyse normally distributed data; that is, female weight change over  
252 breeding and mean larval mass at dispersal. We used a quasi-Poisson model to analyse data on  
female life span and a binomial model to analyse data on larval survival. Note that we did not use a

254 Cox Proportional-Hazards model to analyse female survival as this was not necessary given that we  
had data on life span of all females, allowing us to compare the life spans of females in the different  
256 treatment groups, and because our data did not satisfy the assumption of proportional hazards  
(Therneau, 2015;  $\chi^2 = 12.0$ ,  $P = 0.007$ ). All models included the treatment as a fixed effect with  
258 four levels (i.e. infected, immune-challenged, injured and control females). To account for potential  
effects of brood size on maternal care (Smiseth et al., 2003; Ratz & Smiseth, 2018), we also  
260 included brood size at the time of observation as covariate in the model analysing maternal care.  
We ran pairwise comparisons using a Tukey's test with the Bonferroni correction whenever the  
262 treatment had a significant effect.

To analyse data on gene expression, we first calculated the expression of a gene of interest  
264 relative to the reference gene *rpl7* to obtain  $\Delta C_T$  values (Livak & Schmittgen, 2001). We then used  
ANOVA models to for effects of the experimental treatment on the  $\Delta C_T$  values of each gene.  
266 Whenever the treatment had a significant effect on gene expression, we ran pairwise comparisons  
using a Tukey's test with the Bonferroni correction.

268 Among the 245 females, we sacrificed a subset of 59 females to sample hemolymph, of  
which one was excluded because not enough hemolymph was obtained. Among the remaining  
270 females, we excluded 55 additional females from our analysis on maternal care, life span and larval  
survival because their eggs fail to hatch ( $N = 10$ ), there were not enough larvae to allocate them a  
272 brood ( $N = 25$ ), the female or the whole brood died before the observation ( $N = 12$ ), no behavioural  
data were collected ( $N = 1$ ), or the heat-kill treatment failed ( $N = 7$ ). The final sample of the  
274 behavioural and life history data included 33 control females, 32 injured females, 33 immune-  
challenged females, and 33 infected females. Likewise, we excluded 9 broods (control females:  $N =$   
276 4; injured females:  $N = 3$ ; immune-challenged females:  $N = 2$ ) from our analysis on mean larval  
mass at dispersal because no larvae survived to dispersal.

278

## Results

280 There was a significant effect of treatment on female life span (figure 1a;  $\chi^2 = 52.1$ ,  $df = 3$ ,  $P <$   
0.001), which reflected that infected females had an average life span that was 75% shorter than  
282 females from any other treatment group (Table 1). There was no significant effect of treatment on  
the amount of care provided by females (figure 1b;  $\chi^2 = 6.63$ ,  $df = 3$ ,  $P = 0.085$ ), showing that  
284 females maintained a similar level of care to control females regardless of whether they were  
infected, immune-challenged or injured. There was no effect of brood size at the time of  
286 observation on maternal care ( $\chi^2 = 2.62$ ,  $df = 1$ ,  $P = 0.105$ ). There was no effect of treatment on  
mean larval mass at dispersal (Sum Sq = 0.003,  $df = 3$ ,  $F = 0.613$ ,  $P = 0.608$ ) or survival of the  
288 larvae until dispersal ( $\chi^2 = 5.66$ ,  $df = 3$ ,  $P = 0.129$ ), suggesting that infected, immune-challenged or  
injured females maintained a similar level reproductive output to control females. There was no  
290 difference in weight change between females in the different treatments (Sum Sq = 174.7,  $df = 3$ ,  $F$   
= 1.42,  $P = 0.239$ ).

292 We next investigated the effects of the experimental treatments on the expression of four  
immune genes. Treatment had a significant effect on the expression of *coleoptericin-1* (figure 2a;  
294 Sum Sq = 780.3,  $df = 3$ ,  $F = 42.9$ ,  $P < 0.0001$ ). The expression of this gene was lower in injured  
females than in control females (Table 2), lower in immune-challenged females than in injured  
296 females (Table 2), and similar in immune-challenged and infected females (Table 2). Treatment  
also had a significant effect on the expression of *PGRP-SC2* (figure 2b; Sum Sq = 266.7,  $df = 3$ ,  $F =$   
298 3.47,  $P = 0.022$ ). The expression of this gene was reduced in injured females compared with  
infected ones (Table 2), while there was no difference in expression between females in any of the  
300 other treatment groups (Table 2). We found no significant effect of treatment on the expression of  
*attacin-4* (figure 2c; Sum Sq = 45.7,  $df = 3$ ,  $F = 1.55$ ,  $P = 0.211$ ) or *cecropin-1* (figure 2d; Sum Sq =  
302 21.1,  $df = 3$ ,  $F = 1.57$ ,  $P = 0.206$ ).

304 **Discussion**

Here we show that infected and immune-challenged females altered their expression of immune  
306 genes, and that infected females had a shortened life span compared to other females. Despite the  
heightened mortality of infected females, we found no evidence for a difference between infected,  
308 immune-challenged, injured and control females in their level of care or their reproductive output.  
Altogether, our findings indicate that infected females maintained their level of care despite  
310 indication that they mounted an immune response against the pathogen and clear evidence that the  
pathogen shortened their life span. This strategy may allow infected females to provide the  
312 necessary amount of care to ensure the growth and survival of their offspring but might be  
detrimental to the parents by increasing their mortality and may potentially even facilitate disease  
314 transmission to offspring. Below we discuss the broader implications of these findings to our  
understanding of the effects of infection on parental behaviour and social interactions between  
316 caring parents and their dependent offspring.

As expected, we found that infected females altered their expression of immune genes and  
318 had a considerably shortened life span, confirming that infection with *Serratia marcescens* had the  
intended effect of triggering an immune response and making infected females sick. Immune-  
320 challenged females showed a similar change in the expression of immune genes as infected females,  
but suffered no corresponding reduction in their life span. Thus, our results confirm that the  
322 shortened life span of infected females was caused by the pathogen rather than being a by-product  
of females mounting an immune response. Taken together, our results confirm that *Serratia*  
324 *marcescens* is a potent pathogen in *N. vespilloides*. We are not aware of any prior studies on *N.*  
*vespilloides* reporting elevated mortality as a result of an infection, which may reflect the difficulty  
326 in establishing experimental infections in this species. This may reflect that this species breeds on  
decomposing carcasses, which means they regularly will be in close contact with potential  
328 pathogens (Jacobs et al., 2014; Wang & Rozen, 2018). Our study species might thus be resistant to

a wide variety of bacterial strains, such as *Bacillus subtilis* (Reavey et al., 2015), *Pectobacterium*  
330 *carotovorum*, *Pseudomonas aeruginosa*, *P. entomophila*, or *S. marcescens* at low doses and  
concentrations (Ratz et al., unpublished data) that are pathogenic in many others insect species. Our  
332 results show that, as long as *S. marcescens* is injected in relatively high dose and concentration, it  
can successfully establish an infection in *N. vespilloides*, activate the immune system, and greatly  
334 increase mortality.

Our main finding was that infected females maintained their level of care and their  
336 reproductive output, despite that these females had mounted an immune response and were  
suffering negative fitness consequences of infection as indicated by their shortened life span. Our  
338 results suggest that infected females maintained their level of care at the expense of allocating more  
resources towards immunity. Our results are similar to those of a recent study on the amphipods  
340 *Crangonyx pseudogracilis* and *Gammarus duebeni* (Arundell et al., 2014). In this study, infection  
by a microsporidian did not affect brood care behaviour or the duration of brooding of females. By  
342 maintaining their level of care, infected females may ensure that offspring receive the necessary  
amount of care and produce offspring with a similar survival and body size as offspring of  
344 uninfected females. This strategy might allow infected females to maintain their reproductive output  
(Arundell et al., 2014), but might come at a cost in terms of reduced survival and future  
346 reproductive success. Burying beetles can produce multiple broods (Creighton et al., 2009) and tend  
to gain mass during first reproductive, which is positively correlated with life span (Gray et al.,  
348 2018). Our results suggest that infected females would have lower fitness because it seems unlikely  
that the infected females in our study could reproduce again. The reason for this is that  
350 approximately 60% of infected females had died by 17 days after the infection (compared with 0%  
of control females; figure 1a). Thus, many infected females had died before they would have been  
352 able to produce an additional brood. In order to breed again, females must first remain with the  
current brood until larvae complete their development, which would take about 7 days (Smiseth et

354 al., 2003; 2005). They then need to search for and secure a new carcass, which are thought to be  
rare (Scott, 1998), and produce eggs and care for the new brood, which would take another 10 days  
356 (Ford & Smiseth, 2017). An alternative explanation for our results is that infected females perceived  
their chance to survive and reproduce again to be very low, and that they therefore maintained a  
358 high level of care as a terminal investment response (Williams, 1966). This is suggested by other  
studies in the species reporting high reproductive output in response to immune-challenges (e.g.  
360 Cotter et al; 2010; Reavey et al., 2014; Reavey et al., 2015; Farchmin et al., 2020). We found no  
evidence for an increase in reproductive investment as would be expected under terminal  
362 investment. However, this may reflect that infected females were simply not able to increase their  
level of care. We would have expected immune-challenged females, exposed to pathogen cues but  
364 not infected, to be able to increase care given that they did not show any evidence of shortened life  
span. We did not find such a response in immune-challenge females. Thus, we suggest that, rather  
366 than mounting a terminal investment response, infected females maintained their level of care to  
provide the necessary amount of care to ensure offspring growth and survival, which might come at  
368 a cost to females in terms of reduced survival.

Our finding that infected females maintained their level of care also shows that infections do  
370 not necessarily induce sickness behaviour. Infections are often associated with a reduction in the  
host's social interactions (Hart, 1988; Kelley et al., 2003), which was not the case in our study as  
372 there was no evidence for a reduction in maternal care. Infected hosts often show reduced social  
interactions (Vale et al., 2018), which may be the result of lethargy (i.e., reduced activity levels) of  
374 the host associated with sickness (Adelman & Martin, 2009), the host actively avoiding costly  
social interactions (Sah et al., 2018; Lopes et al., 2016), uninfected individuals avoiding an infected  
376 host (Curtis, 2014), or the pathogen manipulating the host's behaviour (Moore, 2002; Hughes et al.,  
2012). Yet this reduction in social behaviour is not always observed, depending on the social  
378 context (Lopes et al., 2012; Adamo et al., 2015), and parents that are sick might maintain their level



of care and interactions with offspring (Stockmaier et al., 2020). Because parental care and parent-  
380 offspring interactions can have a large impact on the reproductive output of organisms, we propose  
that infected parents might prioritise their allocation in reproduction by maintaining necessary care  
382 and social interactions with their offspring. In species with biparental care, infected females might  
be able to reduce their level of care (and thereby increase their immune response) without harming  
384 their offspring if the male parent compensate for the reduction in female care. If so, male  
compensation could temper the negative effect of infection on female life span. Thus, we encourage  
386 future studies to compare the responses of infected females in the contexts of biparental care and  
uniparental care.

388 Our last finding was that females from our different treatment groups showed different  
levels of expression in two immune genes (i.e. *coleoptericin-1* and *PGRP-SC2*), while there was no  
390 difference in the expression of two other immune genes (i.e. *attacin-4* and *cecropin-1*). The  
expression of *coleoptericin-1*, a gene involved in personal immunity (Jacobs et al., 2016; Parker et  
392 al., 2015), was lower in immune-challenged and infected females than in injured and control  
females. In contrast, the expression of *PGRP-SC2*, a gene involved in social immunity (Parker et  
394 al., 2015; Ziadie et al., 2019), was higher in infected females than in injured females. Given that  
there was no difference in immune gene expression between immune-challenged and infected  
396 females, it seems unlikely that the pathogen suppressed the immune system in our study species.  
Instead, these results might reflect immune responses to the presence of a pathogen or, in the case  
398 of immune-challenged females, to the presence of cues from a potential pathogen. Thus, our finding  
that infected females had lower personal immunity and higher social immunity points towards a  
400 shift in investment towards current reproduction. This suggests that infected and immune-  
challenged females maintained their investment in social immunity that benefit larval survival,  
402 which would be in line with the idea that infected females overall sought to maintain their allocation  
towards current reproduction. However, we urge caution in interpreting our results given that our

404 study focused on the expression of four immune genes, which might not reflect the immune  
response as a whole.

406 Our findings have important implications for our understanding of parental behaviour under  
the risk of infection by showing that infected females maintained a high level of care despite that  
408 infections could expose their offspring to the pathogen. Thus, our results show that the level of care  
is remarkably stable in response to infection, despite evidence that parents often show a great  
410 amount of plasticity in response to other environmental factors, such as resource abundance and the  
presence of competitors and infanticidal conspecifics (Smiseth & Moore, 2002; Hopwood et al.  
412 2015; Georgiou Shippi et al. 2018). Furthermore, behavioural plasticity represents the first  
mechanism of immunity (Schaller, 2006; Schaller & Park, 2011; Kiesecker et al., 1999) and might  
414 allow infected individuals to reduce the risk of transmission to close kin, such as offspring (Shakhar  
& Shakhar, 2015; Shakhar, 2019). Our study found no evidence that females transmitted the  
416 pathogen to their offspring given that we found no evidence that larvae of infected females had  
lower survival than larvae of other females. Nevertheless, we urge future studies to consider the  
418 potential consequences of disease transmission by caring parents to their offspring (Chakarov et al.  
2015). For example, infected parents might be expected to maintain their level of care in situations  
420 where the risk of females passing on the pathogen to their offspring is low. In contrast, infected  
parents might reduce their level of care in situations where the risk of females passing on the  
422 pathogen to their offspring is high and where the offspring are not completely dependent on their  
parents.

424 In summary, our study shows that infected females maintained their level parental care and  
reproductive output despite mounting an immune response and suffering from greater mortality.  
426 Our results demonstrate that parental care, which is generally highly flexible, can remain robust and  
stable in response to pathogenic infections. Our results suggest that infected females maintain their  
428 current reproductive success over survival, which could ensure that offspring receive the necessary

amount of care. Our findings stress the need for more studies on infection in species where parents  
430 care for and interact with their offspring, as parental care is a fundamental social interaction in all  
birds and mammals as well as some amphibians, fishes and arthropods and as it can have  
432 contradicting effects by buffering against environmental hazards on the one hand and providing a  
potential route for disease transmission on the other hand.

434

### Acknowledgments

436 We thank the City of Edinburgh Natural Heritage Service for permission to collect beetles in their  
reserve at the Hermitage of Braid and Blackford Hill Local Nature Reserve. We also thank Jon  
438 Richardson for assistance with maintaining the laboratory population, Arun Prakash, Sarah Reece,  
Saudamini Venkatesan, Ferghal Waldron and Michelle Ziadie for suggestions and useful advice on  
440 the experimental set up, and Eevi Savola for helpful discussions regarding the analysis of gene  
expression data. T.R. was supported by the Darwin Trust of Edinburgh.

442

### References

- 444 Adamo, S. A., Gomez-Juliano, A., LeDue, E. E., Little, S. N., & Sullivan, K. (2015). Effect of  
immune challenge on aggressive behaviour: how to fight two battles at once. *Animal*  
446 *Behaviour*, *105*, 153–161.
- Adelman, J. S., & Martin, L. B. (2009). Vertebrate sickness behaviors: adaptive and integrated  
448 neuroendocrine immune responses. *Integrative and Comparative Biology*, *49*, 202–214.
- Arundell, K.L., Wedell, N., & Dunn, A.M., 2014. The impact of predation risk and of parasitic  
450 infection on parental care in brooding crustaceans. *Animal Behaviour*, *96*, pp.97-105.
- Aubert, A., Goodall, G., Dantzer, R., & Gheusi, G. (1997). Differential effects of  
452 lipopolysaccharide on pup retrieving and nest building in lactating mice. *Brain, behavior, and*  
*immunity*, *11*, 107–118.
- 454 Bonneaud, C., Mazuc, J., Gonzalez, G., Haussy, C., Chastel, O., Faivre, B. & Sorci, G. (2003).  
Assessing the cost of mounting an immune response. *The American Naturalist*, *161*, 367–379.
- 456 Bos, N., Lefèvre, T., Jensen, A. B., & d’Ettorre, P. (2012). Sick ants become unsociable. *Journal of*  
*evolutionary biology*, *25*, 342–351.
- 458 Brooks, M. E., Kristensen, K., van Benthem, K. J., Magnusson, A., Berg, C. W., Nielsen, A.,  
Skaug, H. J., Maechler, M., & Bolker, B. (2017). Modeling zero-inflated count data with  
460 glmmTMB. *bioRxiv*, 132753.

- Bradley, C. A., & Altizer, S. (2005). Parasites hinder monarch butterfly flight: implications for  
462 disease spread in migratory hosts. *Ecology Letters*, 8, 290–300.
- Cameron, P. G., Semlitsch, R. D., & Bernasconi, M. V. (1993). Effects of body size and parasite  
464 infection on the locomotory performance of juvenile toads, *Bufo bufo*. *Oikos*, 66, 129–136.
- Chakarov, N., Linke, B., Boerner, M., Goesmann, A., Krüger, O., & Hoffman, J. I. (2015).  
466 Apparent vector-mediated parent-to-offspring transmission in an avian malaria-like  
parasite. *Molecular Ecology*, 24, 1355–1363.
- 468 Cotter, S. C., & Kilner, R. (2010a). Personal immunity versus social immunity. *Behavioral  
Ecology*, 21, 663–668.
- 470 Cotter, S. C., & Kilner, R. (2010b). Sexual division of antibacterial resource defence in breeding  
burying beetles, *Nicrophorus vespilloides*. *Journal of Animal Ecology*, 79, 35–43.
- 472 Cotter, S. C., Ward, R. J., & Kilner, R. M. (2010). Age-specific reproductive investment in female  
burying beetles: independent effects of state and risk of death. *Functional Ecology*, 25, 652–  
474 660.
- Creighton, J. C., Heflin, N. D. & Belk, M. C. (2009). Cost of reproduction, resource quality, and  
476 terminal investment in a burying beetle. *The American Naturalist*, 174, 673–684.
- Curtis, V.A. (2014). Infection-avoidance behaviour in humans and other animals. *Trends in  
478 Immunology*, 35, 457–464.
- Eggert, A. K., Reinking, M., & Müller, J. K. (1998). Parental care improves offspring survival  
480 and growth in burying beetles. *Animal Behaviour*, 55, 97–107.
- El Sanousi, S. M., El Sarag, M. S. A., & Mohamed, S. E. (1987). Properties of *Serratia marcescens*  
482 isolated from diseased honeybee (*Apis mellifera*) larvae. *Microbiology*, 133, 215–219.
- Exton, M. S., (1997). Infection-induced anorexia: active host defence strategy. *Appetite*, 29, 369–  
484 383.
- Farchmin, P. A., Eggert, A.-K., Duffield, K. R., & Sakaluk, S. K. (2020). Dynamic terminal  
486 investment in male burying beetles. *Animal Behaviour*, 163, 1–7.
- Ford, L. E., & Smiseth, P.T. (2017). Asynchronous hatching in a nonavian species: a test of the  
488 hurry-up hypothesis. *Behavioral Ecology*, 28, 899–907.
- Fox, J., Weisberg, S., Adler, D., Bates, D., Baud-bovy, G., Ellison, S., Firth, D., Friendly, M.,  
490 Gorjanc, G., Graves, S., et al. (2016). Package “car.” CRAN Repos.:171.
- Georgiou Shippi, A. G., Paquet, M., & Smiseth, P. T. (2018). Sex differences in parental defence  
492 against conspecific intruders in the burying beetle *Nicrophorus vespilloides*. *Animal  
Behaviour*, 136, 21–29.
- 494 Gray, F. E., Richardson, J., Ratz, T., & Smiseth, P. T. (2018). No evidence for parent-offspring  
competition in the burying beetle *Nicrophorus vespilloides*. *Behavioral Ecology*, 29, 1142–  
496 1149.
- Hart B. (1988). Biological basis of the behavior of sick animals. *Neuroscience & Biobehavioral  
498 Reviews*, 12, 123–137
- Heinze, J., & Walter, B. (2010). Moribund ants leave their nests to die in social isolation. *Current  
500 Biology*, 20, 249–252.
- Hejazi, A. and Falkiner, F.R., 1997. *Serratia marcescens*. *Journal of medical microbiology*, 46,  
502 903–912.

- Hopwood, P. E., Moore, A. J., Tregenza, T., & Royle, N. J. (2015). Male burying beetles extend, not reduce, parental care duration when reproductive competition is high. *Journal of Evolutionary Biology*, 28, 1394–1402.
- Hughes, D. P., Brodeur, J., & Thomas, F. (2012). *Host manipulation by parasites*. Oxford, UK: Oxford University Press.
- Imler, J. L., & Bulet, P. (2005). Antimicrobial peptides in *Drosophila*: structures, activities and gene regulation. In *Mechanisms of epithelial defense* (Vol. 86, pp. 1–21). Karger Publishers.
- Jacobs, C. G., Steiger, S., Heckel, D. G., Wielsch, N., Vilcinskis, A., & Vogel, H. (2016). Sex, offspring and carcass determine antimicrobial peptide expression in the burying beetle. *Scientific reports*, 6, 1–8.
- Jacobs, C. G., Wang, Y., Vogel, H., Vilcinskis, A., van Der Zee, M. & Rozen, D. E. (2014). Egg survival is reduced by grave-soil microbes in the carrion beetle, *Nicrophorus vespilloides*. *BMC Evolutionary Biology*, 14, 208.
- Johnson, R. W., (2002). The concept of sickness behavior: a brief chronological account of four key discoveries. *Veterinary Immunology & Immunopathology*, 87, 443–450.
- Kelley, K., Bluthé, R., Dantzer, R., Zhou, J., Shen, W., Johnson, R., & Broussard, S. (2003). Cytokine-induced sickness behavior. *Brain, Behavior, and Immunology*, 17, S112–S118
- van Kerckhove, K., Hens, N., Edmunds, W. J., & Eames, K. T. (2013). The impact of illness on social networks: implications for transmission and control of influenza. *American journal of epidemiology*, 178, 1655–1662.
- Kiesecker, J. M., Skelly, D. K., Beard, K. H., & Preisser, E. (1999). Behavioral reduction of infection risk. *Proceedings of the National Academy of Sciences*, 96, 9165–9168.
- Levri, E. P., & Lively, C. M. (1996). The effects of size, reproductive condition, and parasitism on foraging behaviour in a freshwater snail, *Potamopyrus antipodarum*. *Animal Behaviour*, 51, 891–901
- Livak, K. J., & Schmittgen, T. D. (2001). Analysis of relative gene expression data using real-time quantitative PCR and the 2<sup>-</sup>ΔΔCT method. *Methods*, 25, 402–408.
- Lopes, P. C., 2014. When is it socially acceptable to feel sick?. *Proceedings of the Royal Society B: Biological Sciences*, 281, p.20140218.
- Lopes, P. C., Adelman, J., Wingfield, J. C., & Bentley, G. E. (2012). Social context modulates sickness behavior. *Behavioral Ecology and Sociobiology*, 66, 1421–1428.
- Lopes, P. C., Block, P., & König, B. (2016). Infection-induced behavioural changes reduce connectivity and the potential for disease spread in wild mice contact networks. *Scientific reports*, 6, p.31790.
- Lopes, P. C., Block, P., Pontiggia, A., Lindholm, A. K., & König, B. (2018). No evidence for kin protection in the expression of sickness behaviors in house mice. *Scientific reports*, 8, 1–9.
- Moore, J. (2002). *Parasites and the Behavior of Animals*. Oxford, UK: Oxford University Press.
- Müller, J. K., & Eggert, A.-K. (1990). Time-dependent shifts between infanticidal and parental behavior in female burying beetles a mechanism of indirect mother-offspring recognition. *Behavioral Ecology & Sociobiology*, 27, 11–16.
- Parker, D. J., Cunningham, C. B., Walling, C. A., Stamper, C. E., Head, M. L., Roy-Zokan, E. M., McKinney, E. C., Ritchie, M. G., & Moore, A. J. (2015). Transcriptomes of parents identify parenting strategies and sexual conflict in a subsocial beetle. *Nature Communications*, 6, 1–

- 546 12.  
R Development Core Team R. (2011). R: A Language and Environment for Statistical Computing.  
548 Team RDC, editor. R Found. Stat. Comput. 1:409.
- Ratz, T., & Smiseth, P. T. (2018). Flexible parents: joint effects of handicapping and brood size  
550 manipulation on female parental care in *Nicrophorus vespilloides*. *Journal of Evolutionary  
Biology*, 31, 646–656.
- 552 Reavey, C. E., Silva, F. W., & Cotter, S. C. (2015). Bacterial infection increases reproductive  
investment in burying beetles. *Insects*, 6, 926–942.
- 554 Reavey, C. E., Warnock, N. D., Vogel, H., & Cotter, S. C. (2014). Trade-offs between personal  
immunity and reproduction in the burying beetle, *Nicrophorus vespilloides*. *Behavioral  
556 Ecology*, 25, 415–423.
- Richner, H., Christe P., & Oppliger, A. (1995). Paternal investment affects prevalence of malaria.  
558 *Proceedings of the National Academy of Sciences of the United States of America*, 92, 1192–  
1194.
- 560 Ripley, B., Venables, B., Bates, D. M., Hornik, K., Gebhardt, A., Firth, D. (2017). Package  
“MASS.”
- 562 Royle, N. J., Smiseth, P. T., & Kölliker, M. (2012). *The evolution of parental care*. Oxford, UK:  
University Press.
- 564 Rozen, D. E., Engelmoer, D. J. P., & Smiseth, P. T. (2008). Antimicrobial strategies in burying  
beetles breeding on carrion. *Proceedings of the National Academy of Sciences*, 105, 17890–  
566 17895.
- Sah, P., Mann, J., & Bansal, S. (2018). Disease implications of animal social network structure: a  
568 synthesis across social systems. *Journal of Animal Ecology*, 87, 546–558.
- Sarkar, A., Harty, S., Johnson, K. V. A., Moeller, A. H., Archie, E. A., Schell, L. D., Carmody, R.  
570 N., Clutton-Brock, T. H., Dunbar, R. I., & Burnet, P. W. (2020). Microbial transmission in  
animal social networks and the social microbiome. *Nature ecology & evolution*, 1–16.
- 572 Schaller, M. (2006). Parasites, behavioral defenses, and the social psychological mechanisms  
through which cultures are evoked. *Psychological Inquiry*, 17, 96–101.
- 574 Schaller, M., & Park, J. H. (2011). The behavioral immune system (and why it matters). *Current  
directions in psychological science*, 20, 99–103.
- 576 Scott, M. P. (1998). The ecology and behavior of burying beetles. *Annual Review of Entomology*,  
43, 595–618.
- 578 Shakhar, K. (2019). The inclusive behavioral immune system. *Frontiers in psychology*, 10. p.1004.
- Shakhar, K., & Shakhar, G. (2015). Why do we feel sick when infected—can altruism play a role?.  
580 *PLoS Biol*, 13, p.e1002276.
- Siva-Jothy, J. A., Prakash, A., Vasanthakrishnan, R. B., Monteith, K. M., & Vale, P. F. (2018). Oral  
582 bacterial infection and shedding in *Drosophila melanogaster*. *Journal of Visualized  
Experiments*, 135, p.e57676.
- 584 Smiseth, P. T., Darwell, C. T., & Moore, A. J. (2003). Partial begging: an empirical model for the  
early evolution of offspring signalling. *Proceedings of the Royal Society of London. Series B:  
586 Biological Sciences*, 270, 1773–1777.
- Smiseth, P. T., Dawson, C., Varley, E., & Moore, A. J. (2005). How do caring parents respond to  
588 mate loss? Differential response by males and females. *Animal Behaviour*, 69, 551–559.



- Smiseth, P. T., & Moore, A. J. (2002). Does resource availability affect offspring begging and  
590 parental provisioning in a partially begging species? *Animal Behaviour*, *63*, 577–585.
- Smiseth, P. T., & Moore, A. J. (2004). Signalling of hunger when offspring forage by both begging  
592 and self-feeding. *Animal Behaviour*, *67*, 1083–1088.
- Smiseth, P. T., Lennox, L., & Moore, A. J. (2007). Interaction between parental care and sibling  
594 competition: parents enhance offspring growth and exacerbate sibling competition. *Evolution*,  
*61*, 2331–2339.
- Smiseth, P. T., Ward, R. J. S., & Moore, A. J. (2006). Asynchronous hatching in *Nicrophorus*  
596 *vespilloides*, an insect in which parents provide food for their offspring. *Functional Ecology*  
598 *20*, 151–156.
- Steiger, S., Gershman, S. N., Pettinger, A. M., Eggert, A., & Sakaluk, S.K. (2011). Sex differences  
600 in immunity and rapid upregulation of immune defence during parental care in the burying  
beetle, *Nicrophorus orbicollis*. *Functional Ecology*, *25*, 1368–1378.
- 602 Stockmaier, S., Bolnick, D. I., Page, R. A., & Carter, G. G. (2020). Sickness effects on social  
interactions depend on the type of behaviour and relationship. *Journal of Animal Ecology*. In  
604 press.
- Stroeymeyt, N., Grasse, A. V., Crespi, A., Mersch, D. P., Cremer, S., & Keller, L. (2018). Social  
606 network plasticity decreases disease transmission in a eusocial insect. *Science*, *362*, 941–945.
- Therneau, T. (2015). A Package for Survival Analysis in S. version 2.38.
- 608 Vale, P. F., Siva-Jothy, A., Morrill, A., & Forbes, M. R. (2018). The influence of parasites. In A.  
Córdoba-Aguilar, D. González-Tokman, & I. González-Santoyo (Eds.), *Insect Behavior: from*  
610 *mechanisms to ecological and evolutionary consequences* (pp. 273–291). Oxford UK: Oxford  
University Press.
- 612 Venesky, M. D., Parris, M. J. & Storfer, A. (2009). Impacts of *Batrachochytrium dendrobatidis*  
infection on tadpole foraging performance. *EcoHealth*, *6*, 565–575.
- 614 Vilcinskis, A., Stoecker, K., Schmidtberg, H., Röhrich, C.R., & Vogel, H. (2013a). Invasive  
harlequin ladybird carries biological weapons against native competitors. *Science*, *340*, 862–  
616 863.
- Vilcinskis, A., Mukherjee, K., & Vogel, H. (2013b). Expansion of the antimicrobial peptide  
618 repertoire in the invasive ladybird *Harmonia axyridis*. *Proceedings of the Royal Society B:*  
*Biological Sciences*, *280*, 20122113.
- 620 Wang, Y., & Rozen, D. E. (2018). Gut microbiota in the burying beetle, *Nicrophorus vespilloides*,  
provide colonization resistance against larval bacterial pathogens. *Ecology and evolution*, *8*,  
622 1646–1654.
- Williams, G. C. (1966). Natural selection, the costs of reproduction, and a refinement of Lack's  
624 principle. *The American Naturalist*, *100*, 687–690.
- 626 Ziadie, M. A., Ebot-Ojong, F., McKinney, E. C., & Moore, A. J. (2019). Evolution of personal and  
social immunity in the context of parental care. *The American Naturalist*, *193*, 296–308.
- 628

**Table 1:** Pairwise comparisons between treatments for the post-infection life span. P-values were obtained using Tukey’s HSD test and adjusted using the Bonferroni correction.

| Post-infection life span |          |       |        |        |
|--------------------------|----------|-------|--------|--------|
|                          | Estimate | SE    | z      | P      |
| Injured – Control        | -0.035   | 0.117 | -0.299 | 0.991  |
| Challenged – Control     | 0.014    | 0.115 | 0.123  | 0.999  |
| Infected – Control       | -0.866   | 0.148 | -5.83  | <0.001 |
| Injured – Challenged     | -0.049   | 0.116 | -0.424 | 0.974  |
| Infected – Injured       | -0.831   | 0.149 | -5.57  | <0.001 |
| Infected – Challenged    | -0.880   | 0.147 | -5.97  | <0.001 |

Note: Statistically significant P values (<0.05) are shown in boldface.



**Table 2:** Pairwise comparisons between treatments for the level of gene expression. P-values were obtained using Tukey’s HSD test and adjusted using the Bonferroni correction.

|                       | <i>attacin-4</i> |      |        |       | <i>cecropin-1</i> |       |        |       | <i>coleoptericin-1</i> |      |       |                  | <i>PGRP-SC2</i> |      |        |              |
|-----------------------|------------------|------|--------|-------|-------------------|-------|--------|-------|------------------------|------|-------|------------------|-----------------|------|--------|--------------|
|                       | Estimate         | SE   | t      | P     | Estimate          | SE    | t      | P     | Estimate               | SE   | t     | P                | Estimate        | SE   | t      | P            |
| Injured – Control     | 0.365            | 1.20 | 0.304  | 0.990 | 0.176             | 0.844 | 0.209  | 0.997 | -3.10                  | 1.13 | -2.74 | <b>0.045</b>     | -4.36           | 1.98 | -2.19  | 0.136        |
| Challenged – Control  | -1.05            | 1.15 | -0.914 | 0.798 | -0.859            | 0.816 | -1.05  | 0.720 | -9.68                  | 1.06 | -9.07 | <b>&lt;0.001</b> | -1.62           | 1.86 | -0.886 | 0.811        |
| Infected – Control    | -1.93            | 1.20 | -1.60  | 0.385 | -1.35             | 0.829 | -1.63  | 0.367 | -10.9                  | 1.19 | -9.15 | <b>&lt;0.001</b> | 1.66            | 1.94 | 0.856  | 0.826        |
| Injured – Challenged  | 1.41             | 1.12 | 1.25   | 0.594 | 1.03              | 0.799 | 1.29   | 0.569 | 6.58                   | 1.03 | 6.36  | <b>&lt;0.001</b> | -2.71           | 1.86 | -1.45  | 0.471        |
| Infected – Injured    | -2.29            | 1.18 | -1.94  | 0.222 | -1.53             | 0.812 | -1.88  | 0.245 | -7.84                  | 1.16 | -6.72 | <b>&lt;0.001</b> | 6.03            | 1.94 | 3.09   | <b>0.016</b> |
| Infected – Challenged | -0.879           | 1.12 | -0.778 | 0.864 | -0.498            | 0.788 | -0.636 | 0.920 | -1.26                  | 1.10 | -1.14 | 0.666            | 3.32            | 1.82 | 1.81   | 0.275        |

Note: Statistically significant P values (<0.05) are shown in boldface.

## Figure legends

Figure 1. Proportion of females alive over time after the day the treatment was applied (a).

Effects of the experimental treatment on maternal care (b). Open circles represent individual data, closed circles and bars represent Means  $\pm$  SEs.

Figure 2. Effects of the experimental treatment on the expression of *attacin-4* (a), *cecropin-1* (b), *coleoptericin-1* (c), and *PGRP-SC2* (d). Open circles represent individual data, closed circles and bars represent Means  $\pm$  SEs.

[Figure 1]

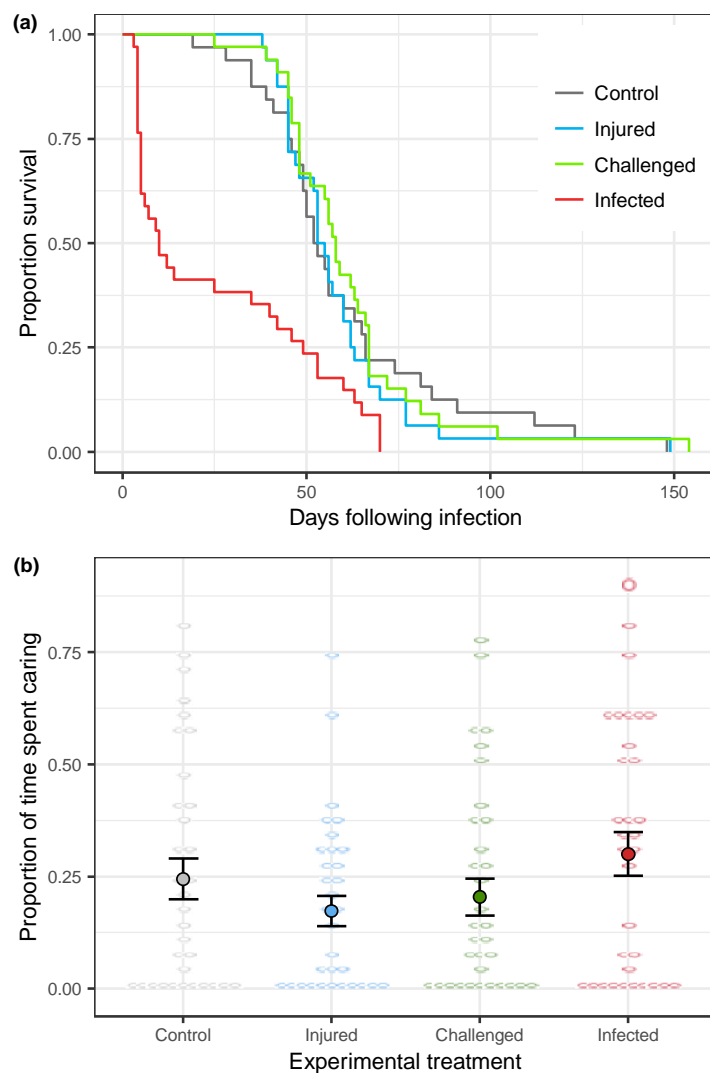

[Figure 2]

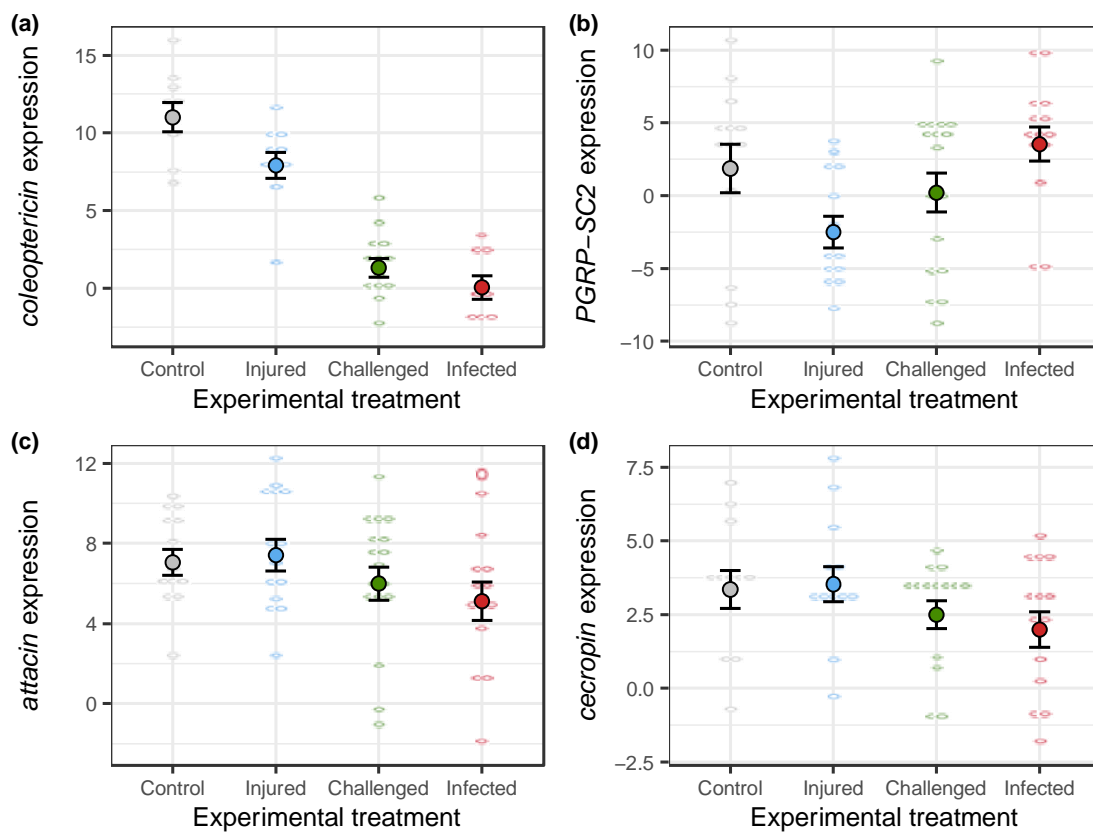

Source: https://www.biorxiv.org/content/10.1101/2020.09.10.291401v1.full.pdf
